# Supplementary material
Source: publisher figshare collection journal article supplement (https://gsapubs.figshare.com/articles/dataset/_/25438729)

Liu, S., Goff, J.A., Feng, W., Liu, Y., Shan, X., Hu, W., Chen, Y., and Wang, Y.P., 2024, Revisiting the stratigraphic development of the postglacial, transgressive paleo-Changjiang (Yangtze River) mouth: A journey from tide-dominated estuary to delta: GSA Bulletin, <https://doi.org/10.1130/B37368.1>.

## Supplemental Material

**Figure S1.** Paleogeography of the Changjiang delta plain, detailing the evolution of the historical shoreline and the en echelon pattern of elongated paleo-islands (river mouth bars and mid-channel bars) of the delta (modified after Fan et al., 2017).

**Figure S2.** Lithological profiles of core YD0902 (modified after Su et al., 2020); enlarged from Figure 10A.

**Figure S3.** Lithological profiles of core CJK08 (modified after Wang, 2011); enlarged from Figure 10A.

**Figure S4.** Lithological profiles of core CJK10 (modified after Wang, 2011); enlarged from Figure 10A.

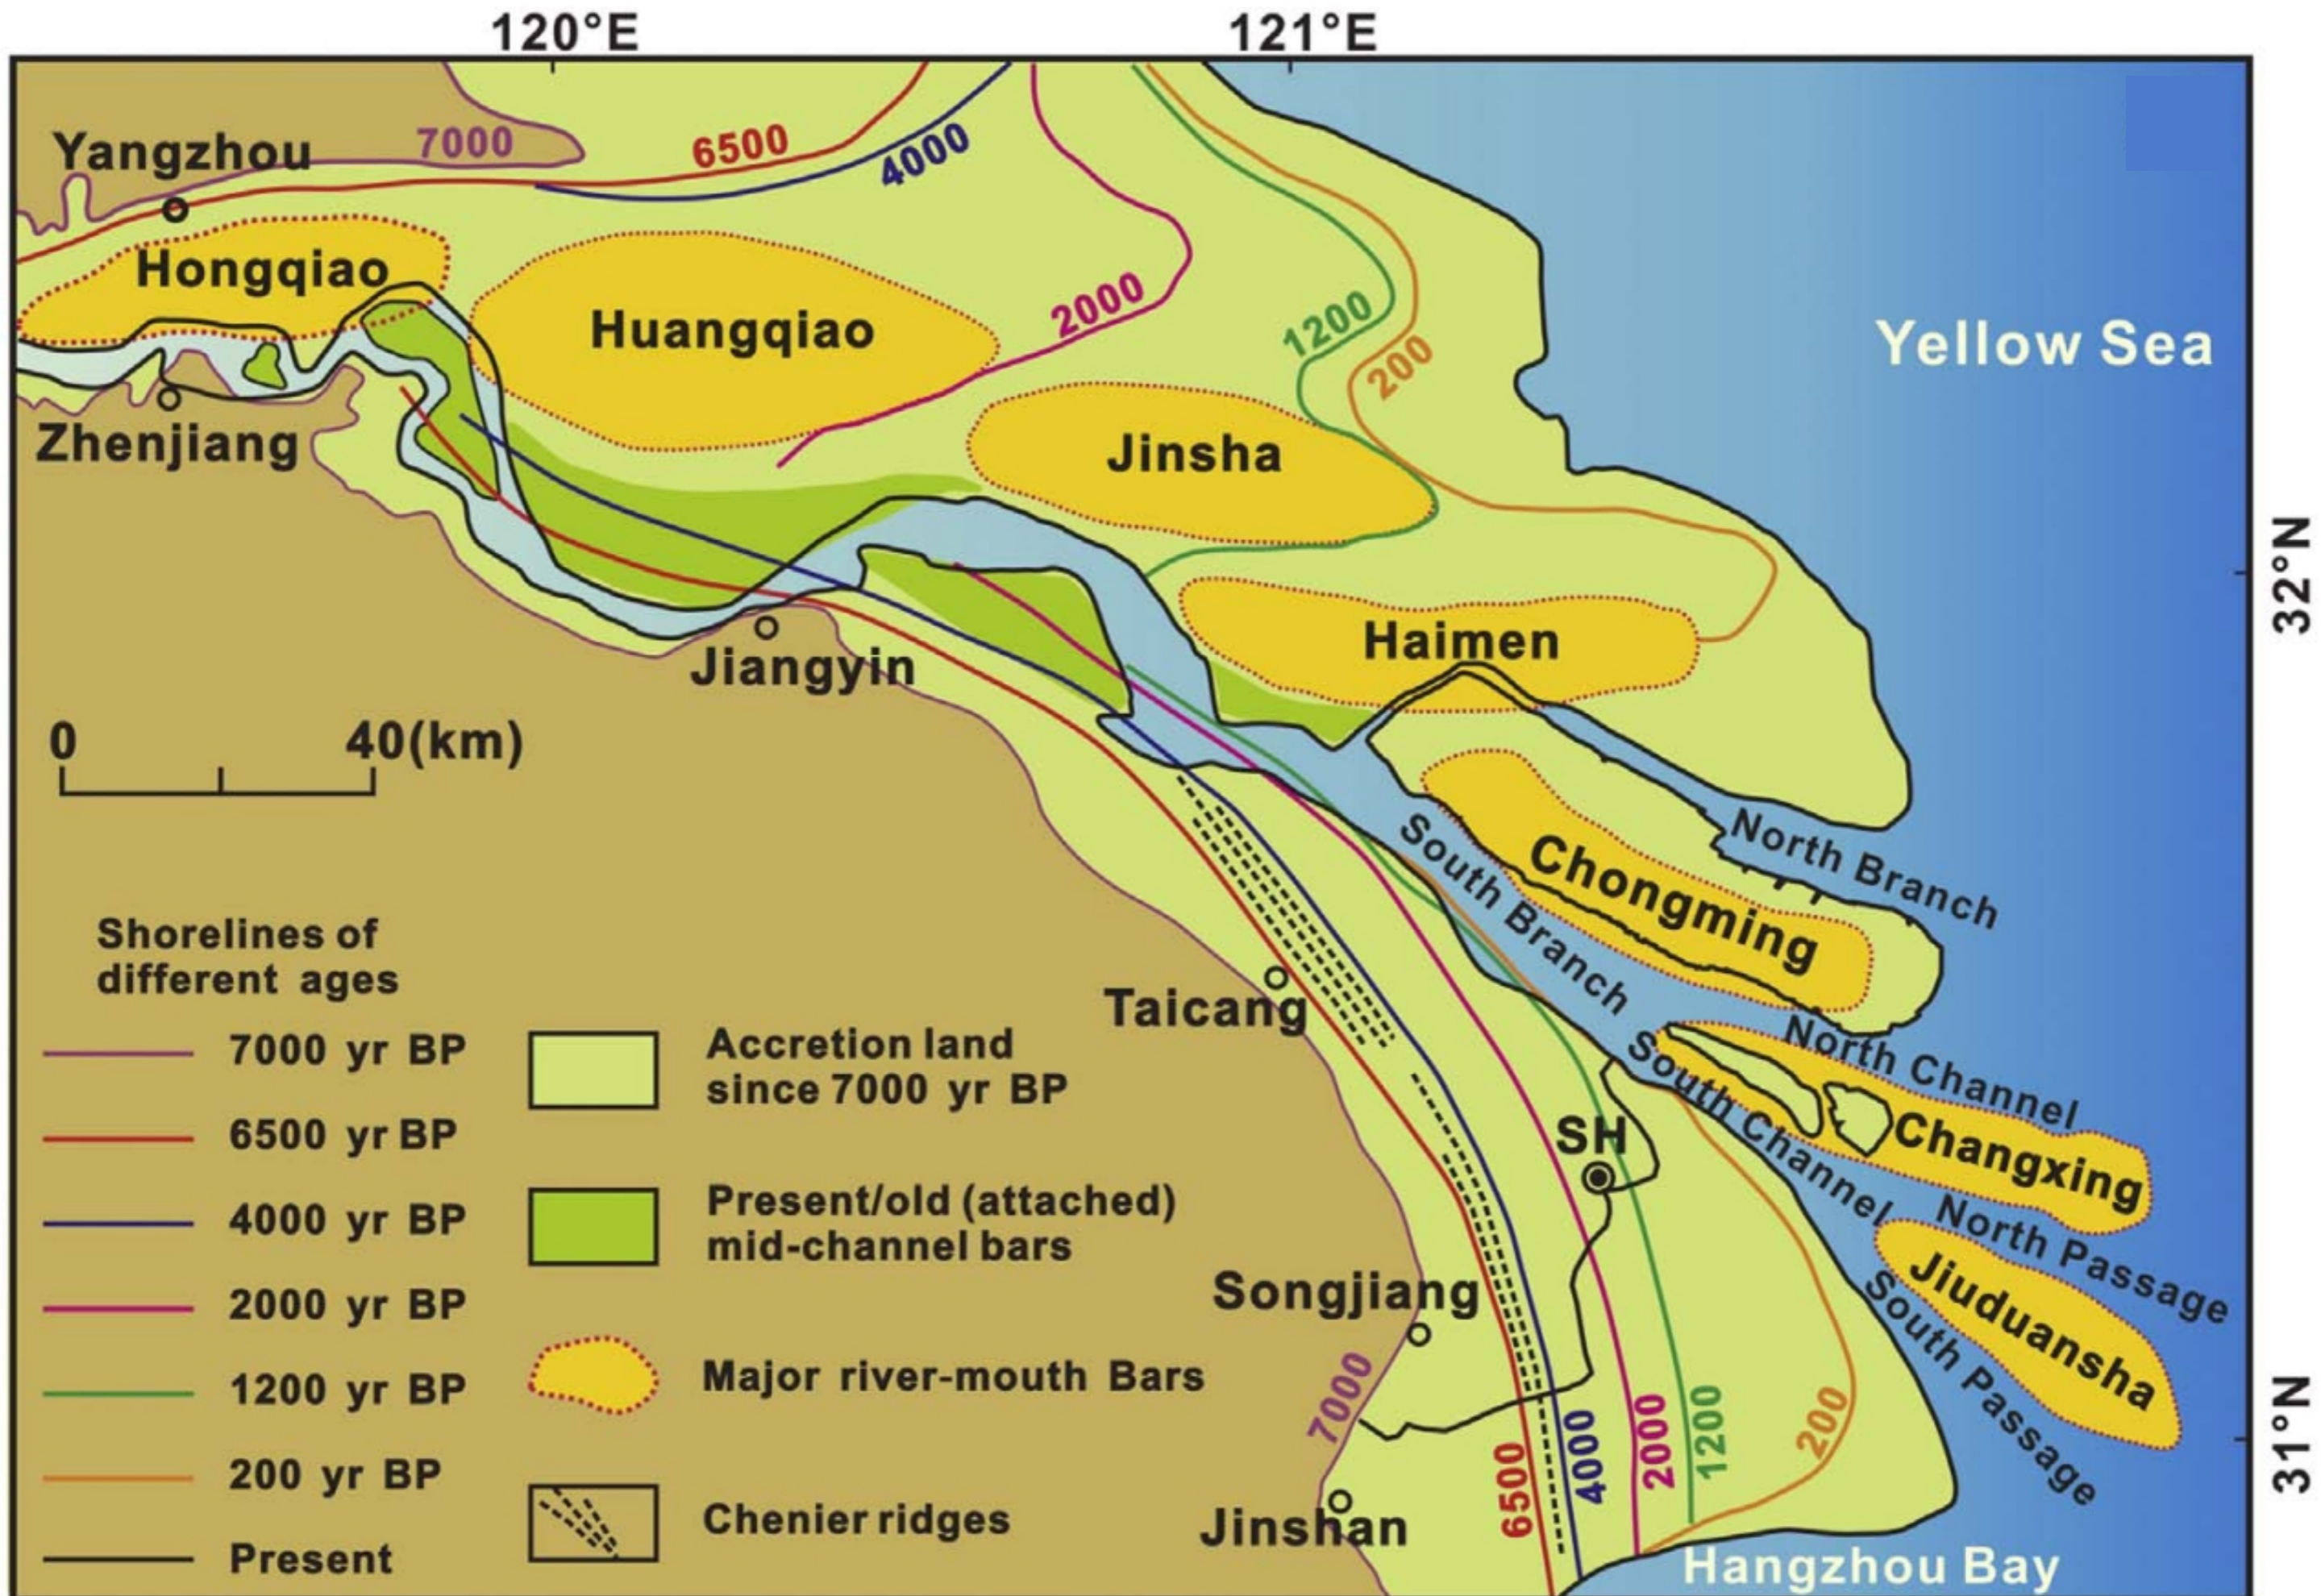

# YD0902

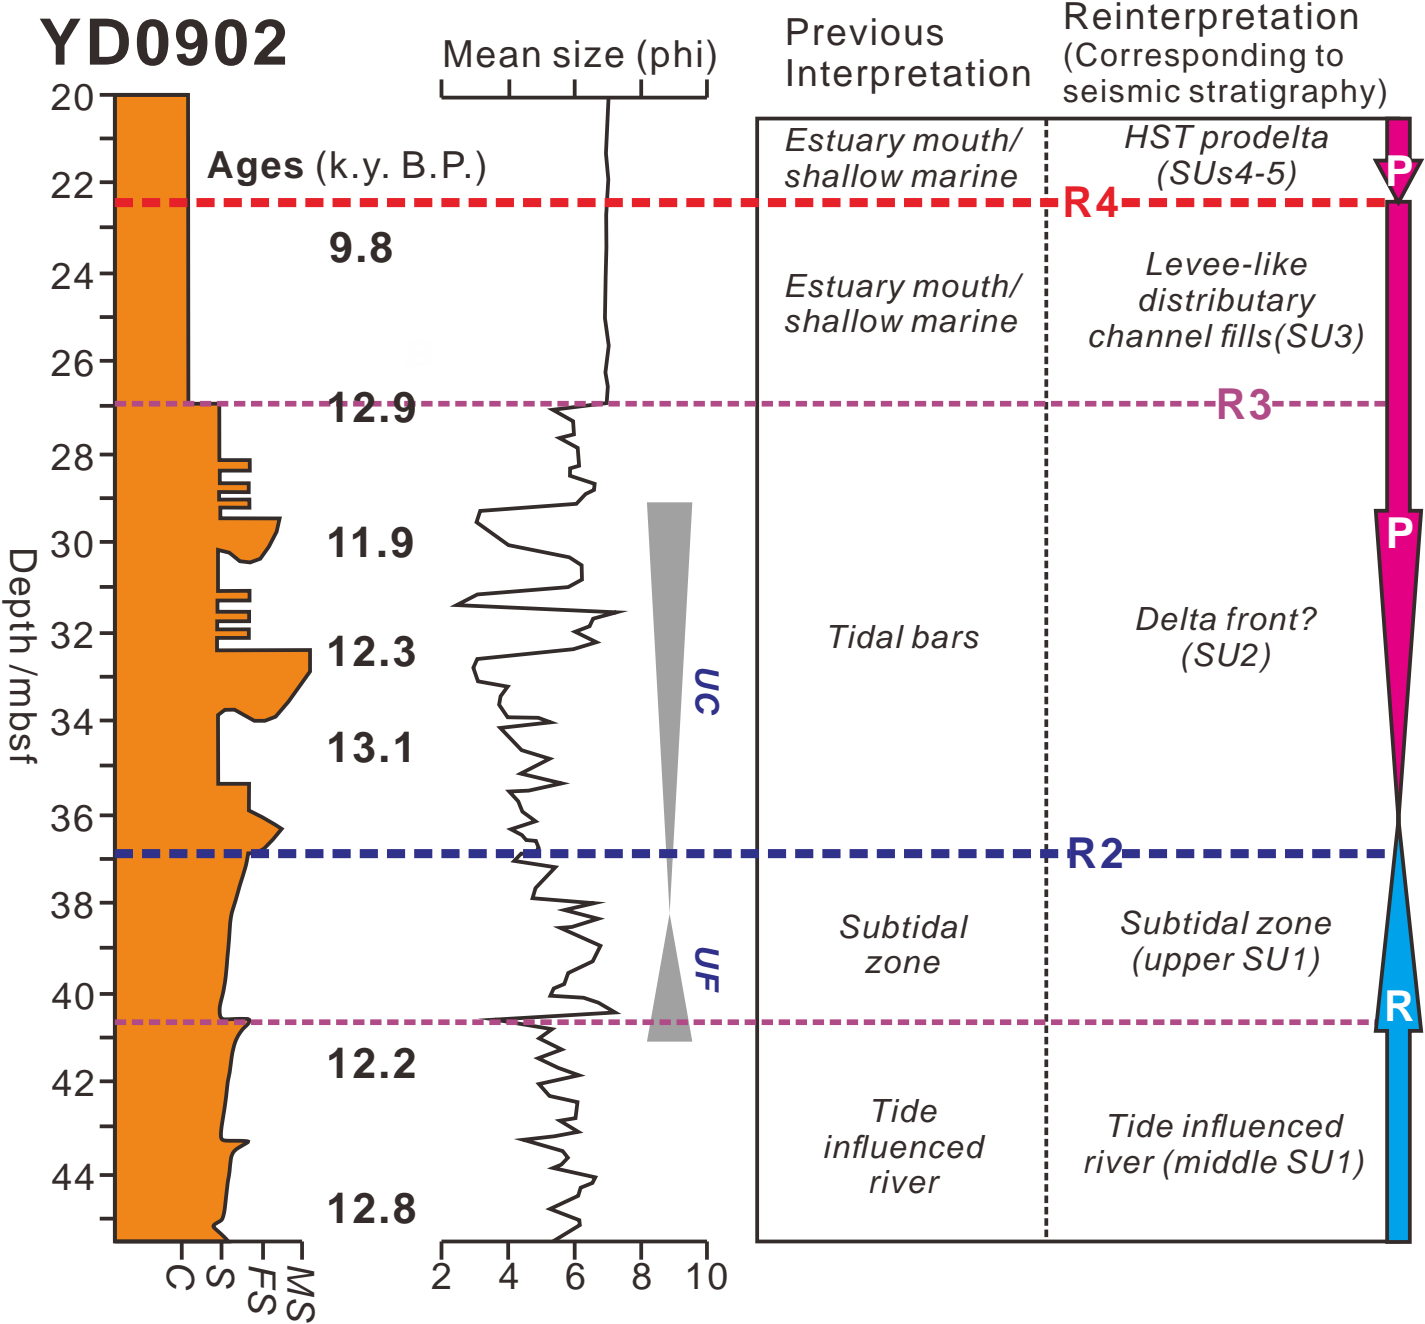

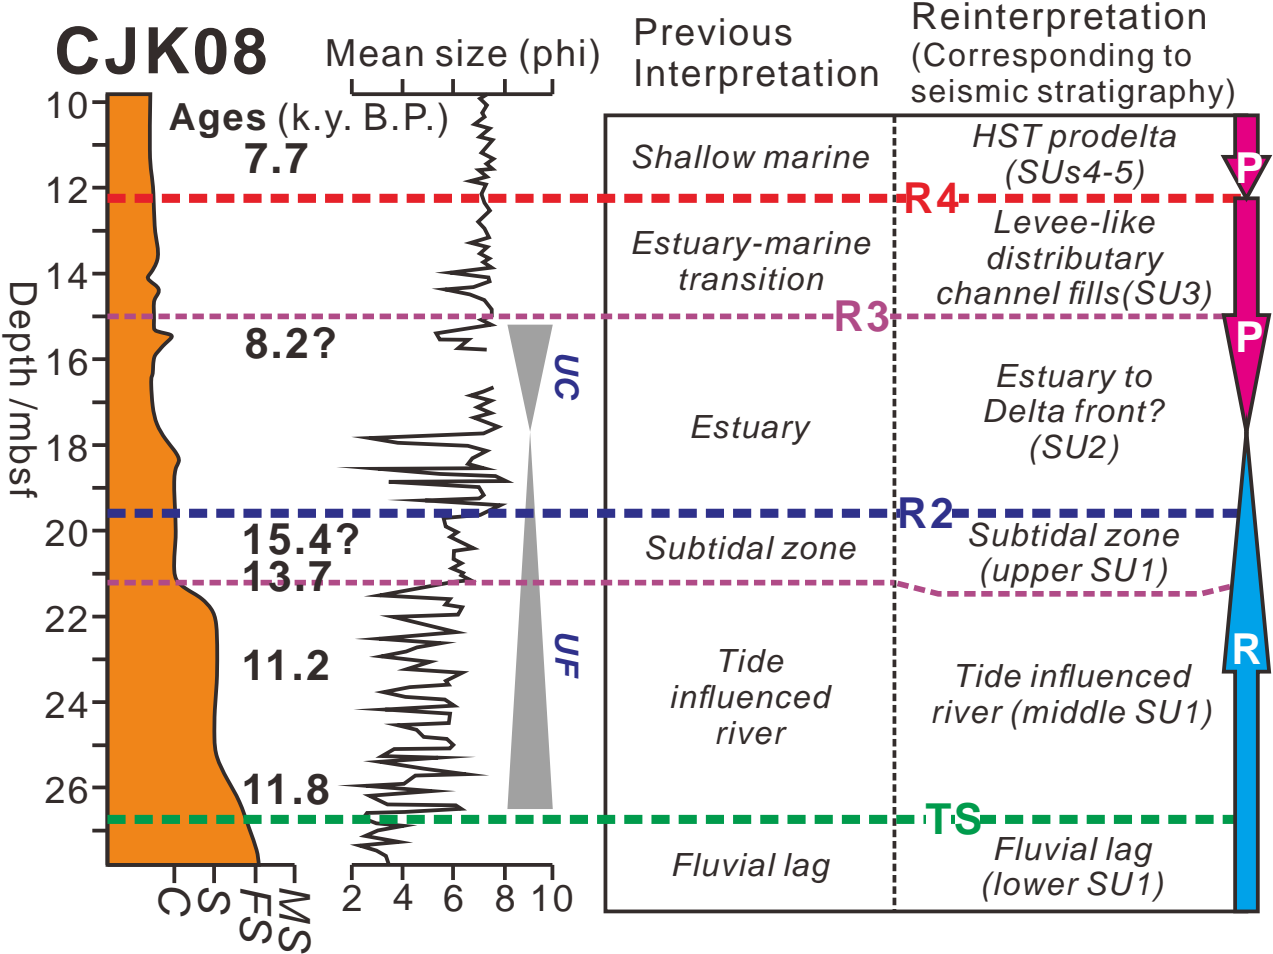

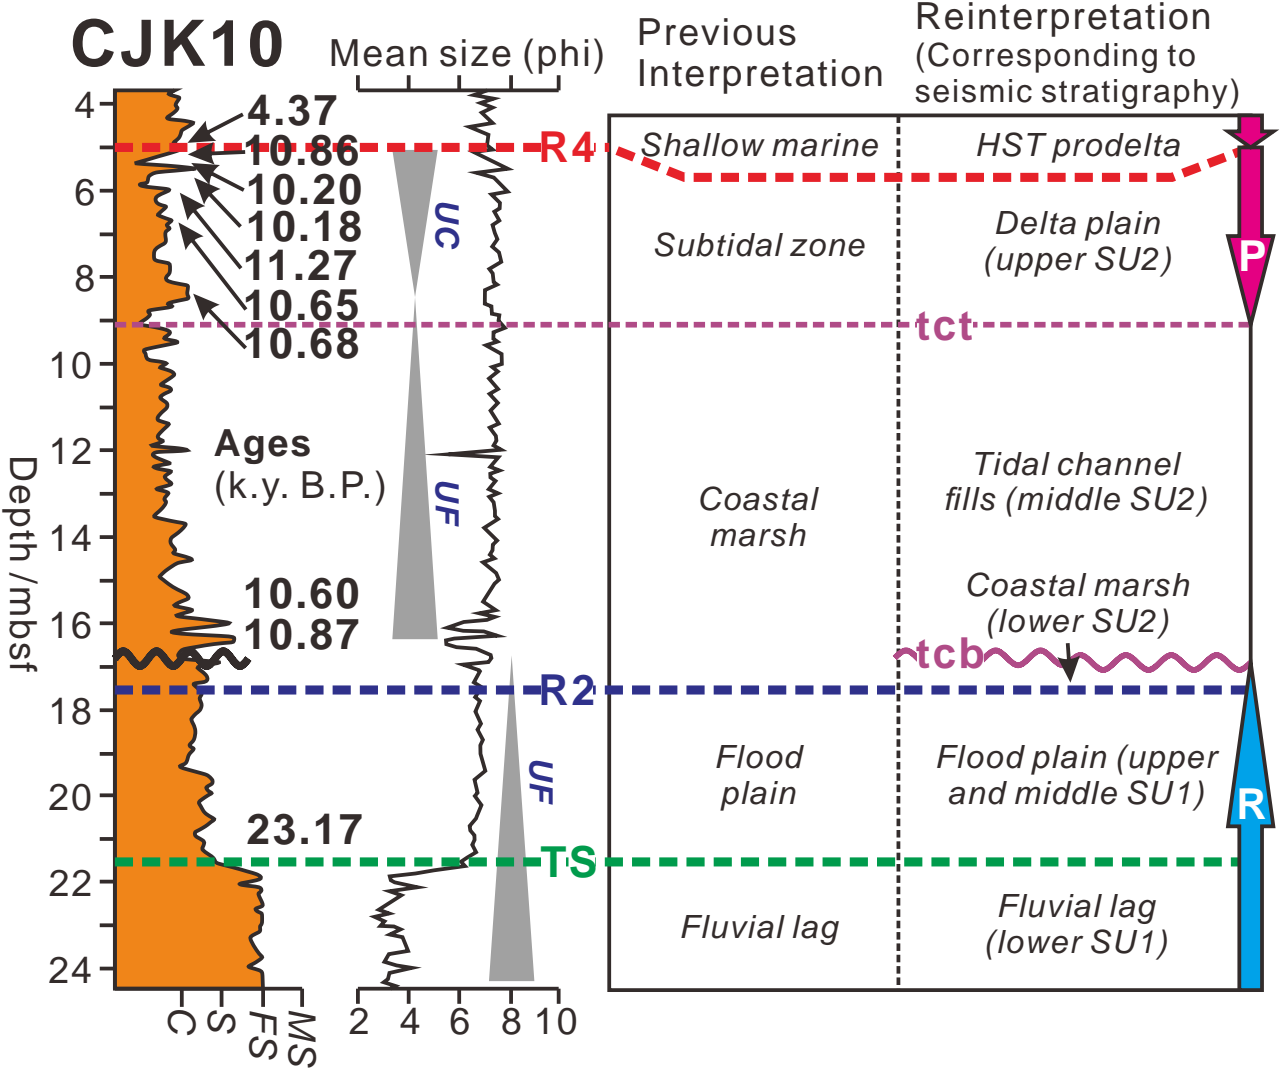

Supplement: Supplementary file 1 [file 45139102]
